# Supplementary material for: Hmga2 is necessary for Otx2-dependent exit of embryonic stem cells from the pluripotent ground state
Source: PubMed Central journal article supplement (PMC4818510; doi:10.1186/s12915-016-0246-5), 2016-03-31
Supplement: 12915_2016_246_MOESM4_ESM.pdf [file 12915_2016_246_MOESM4_ESM.pdf]

**Table S1.** Primers used for qPCR.

| Name*    | Application | Forward primer            | Reverse primer              |
|----------|-------------|---------------------------|-----------------------------|
| Dnmt3b   | RT-qPCR     | CCAAGGACACCAGGACGCGC      | TCCGAGACCTGGTAGCCGGAA       |
| Fgf5     | RT-qPCR     | TCCATGCAAGTGCCAAATTTACGGA | TTCTGTGGATCGCGGACGCA        |
| Gapdh    | RT-qPCR     | GTATGACTCCACTCACGGCAA     | TTCCCATTCTCGGCCTTG          |
| Gata4    | RT-qPCR     | GCCTGTATGTAATGCCTGCG      | CCGAGCAGGAATTTGAAGAGG       |
| Hells    | RT-qPCR     | GGCTGGCGGTAACAGAGTA       | CGGCCTCGGACCTGAGTATT        |
| Hmga2    | RT-qPCR     | AAAACGGCCAAGAGGCAGAC      | ATGTCTCTTCAGTCTCCTGAGCA     |
| Klf4     | RT-qPCR     | ACTCACACAGGCGAGAAACCTTAC  | TCAGTTCATCGGAGCGGG          |
| Myrf     | RT-qPCR     | GCCTTCAGCGTGGTGTCTAT      | CTGGACCTGCCATCAGCATC        |
| Nanog    | RT-qPCR     | TCAGAAGGGCTCAGCACCA       | GCGTTCACCAGATAGCCCTG        |
| Oct4     | RT-qPCR     | AACCTTCAGGAGATATGCAAATCG  | TTCTCAATGCTAGTTCGCTTTCTCT   |
| Oct6     | RT-qPCR     | GACGAGGATGCTCCCAGCT       | AGCTTGATGCGTCGTTGCT         |
| Otx2     | RT-qPCR     | TTCCGTCACTCCAAATCTACCCA   | GCCGGACGGTCTCGATTCGCCTGGAGT |
| Plekha1  | RT-qPCR     | AACAGAGTGACATAATGATGAGGG  | AGAGACTGCTTTAATCCAAGTGTG    |
| Rex1     | RT-qPCR     | GCAGTTTCTTCTTGGGATTTTACG  | CTAATGCCACAGCGAT            |
| Slc16a3  | RT-qPCR     | GGCTGGCGGTAACAGAGTA       | CGGCCTCGGACCTGAGTATT        |
| Fgf5     | ChIP-qPCR   | TAAAAGCCACAGCAGGGACC      | GACAAGAGGAGCCAGGTGAC        |
| Hells    | ChIP-qPCR   | CACTTCCTCCCCAGCTACT       | TTCCGTTCTCCAGGGTTCCT        |
| Hmga2    | ChIP-qPCR   | TGGTCCTTTTGCAGACTGGAT     | GCACTGGTATTCACAAGTCC        |
| Myrf     | ChIP-qPCR   | AGTGTCTGCCTTCTGCTTCC      | GGGTGGCATGTTTGTCCCTT        |
| neg ctrl | ChIP-qPCR   | CAAGCCAGAGCCATGTGGCC      | GGGGGTGTGTGTGGCAAG          |
| Oct6     | ChIP-qPCR   | CCGGGGCTCTGCTAGGATAA      | CTACATCGAGAGGTTGCGCT        |
| Plekha1  | ChIP-qPCR   | ATGGGTGGGTAGAGCCATCT      | CAGCTCACTCACTGTCAGCA        |
| Slc16a3  | ChIP-qPCR   | TGAGCAATGCAAATCCAGCG      | ATCAGAGTGAGGGGCAAGGA        |

\*The primer name is reported as indicated in the Figures.
